# Supplementary material for: Airborne Dissemination of Bacteria (Enterococci, Staphylococci and Enterobacteriaceae) in a Modern Broiler Farm and Its Environment
Source: MDPI journal article supplement (doi:10.3390/ani11061783), 2021-06-15

Article

# Airborne dissemination of bacteria (enterococci, staphylococci and *Enterobacteriaceae*) in a modern broiler farm and its environment

Susana Sanz<sup>1\*</sup>, Carmen Olarte<sup>1</sup>, Raquel Hidalgo-Sanz<sup>2</sup>, Laura Ruiz-Ripa<sup>2</sup>, Rosa Fernández-Fernández<sup>2</sup>, Sara García-Vela<sup>2</sup>, Sandra Martínez-Álvarez<sup>2</sup> and Carmen Torres<sup>2</sup>

<sup>1</sup> Tecnología de los Alimentos, Universidad de La Rioja, Logroño. Spain

<sup>2</sup> Bioquímica y Biología Molecular, Universidad de La Rioja, Spain

\* Susana Sanz. Dpto. Agricultura y Alimentación. Universidad de La Rioja. CCT, C/Madre de Dios, 53. 26006 Logroño (La Rioja) Spain. e-mail: [susana.sanz@unirioja.es](mailto:susana.sanz@unirioja.es) Phone number: +34 941299729 Fax number: +34 941299721

**Supplementary Materials:** The following are available online at [www.mdpi.com/xxx/s1](http://www.mdpi.com/xxx/s1),

Figure S1: Location of sampling points (red dots). The dashed line indicates the fence that delimits the farm.

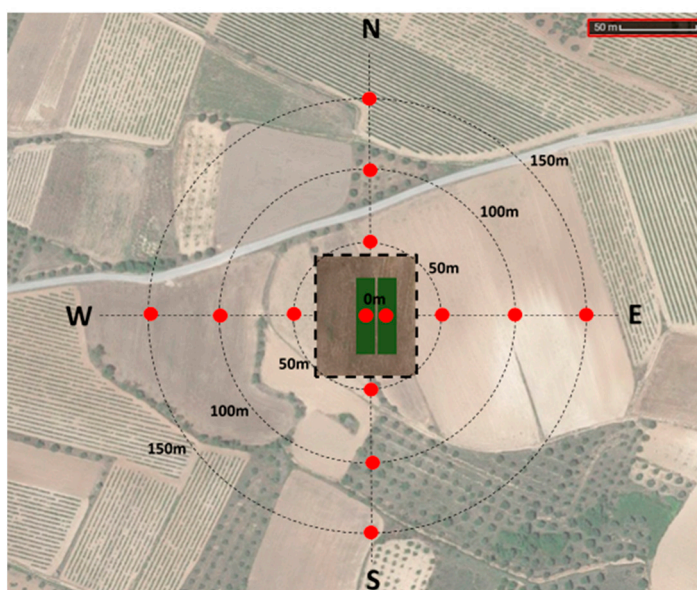

Figure S2a: PFGE patterns of the seven *E. hirae* isolates of phenotypic group E (resistance to tetracycline and intermediate resistance to chloramphenicol) obtained from different origins. Lanes 1, 2 and 3: isolates from litter; Lane 4 and 5: isolates from inside air; Lane 6 and 7: isolates from outside air (50 m west and 150 m east, respectively). Lanes 2, 3, 4, 6 and 7 show indistinguishable banding pattern.

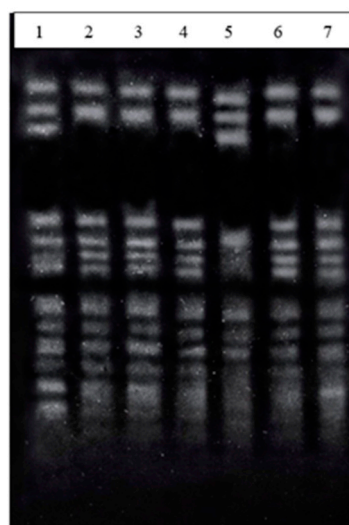

Figure S2b: PFGE patterns of the seven *E. hirae* isolates of phenotypic group F (resistance to tetracycline and erythromycin) isolated from different origins. Lane 1 and 2: isolates from litter; Lane 3 and 4: isolates from inside air; Lane 5 and 6 isolates from outside air in summer sampling (100 m south and 100 m east, respectively); Lane 7: isolate from outside air in winter sampling (100 m east). Lanes 3, 4, 6 and 7 show indistinguishable banding pattern.

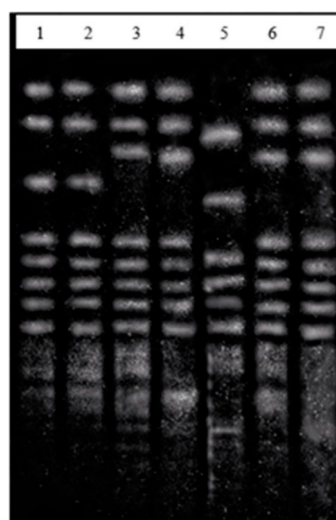

Supplement: s1 [file s1]
